# Supplementary material
Source: MDPI journal article supplement (https://www.mdpi.com/2077-1312/10/12/1917)
Supplement: s1 [file s1]

**Supplementary Table S2.** Primers used for amplifying the *COI* gene.

| PRIMER NAME     | SEQUENCE                       | DIRECTION | CODE IN BOLD | REFERENCE                          |
|-----------------|--------------------------------|-----------|--------------|------------------------------------|
| <b>LCO1490</b>  | 5'GGTCAACAAATCATAAAGATATTGG3'  | Forward   | LCO1490      | Folmer et al. (1994)               |
| <b>HCO2198</b>  | 5'TAAACTTCAGGGTGACCAAAAAATCA3' | Reverse   | HCO2198      | Folmer et al. (1994)               |
| <b>MCOIF</b>    | 5'TCTACAAATCATAAAGACATAGG3'    | Forward   | MCOIF        | Folmer et al. (1994)               |
| <b>MCOIR</b>    | 5'GAGAAATTATACCAAAACCAG3'      | Reverse   | MCOIR        | Fukami et al. (2004)               |
| <b>FOL-LDEG</b> | 5'TCWACHAAYCATAARGAYATWGG3'    | Forward   | DEGmtCO1F    | Modified from Folmer et al. (1994) |
| <b>FOL-HDEG</b> | 5'TAAACYTCDGGRTGCCCAAARAAYCA3' | Reverse   | DEGmtCO1R    | Modified from Folmer et al. (1994) |

#### References

- Folmer, o, Black, M., Hoeh, W., Lutz, R., & Vrijenhoek, R. (1994). DNA primers for amplification of mitochondrial cytochrome c oxidase subunit I from diverse metazoan invertebrates. *Molecular Marine Biology and Biotechnology*, 3(5), 294–299.
- Fukami, H., Budd, A. F., Paulay, G., Solé-Cava, A., Chen, C. A., Iwao, K., & Knowlton, N. (2004). Conventional taxonomy obscures deep divergence between Pacific and Atlantic corals. *Nature*, 427(6977), 832–835. <https://doi.org/10.1038/nature02339>
