# Supplementary material
Source: MDPI journal article supplement (https://www.mdpi.com/2077-1312/10/12/1917)
Supplement: s1 [file s1]

**Supplementary Table S1.** Full list of samples collected in this research . Sample session (1) January 18-19/2013. (2) April 12-15/2013. (3) August 13-16/2013. (4) August 28th 2013. Sample site (KIS) Kisoski beach (29°32'49.98"N, 34°57'14.78"E). (DEK) Dekel beach (29°32'24.67"N, 34°56'51.23"E). (IUI) the Inter-University Institute for Marine Sciences in Eilat (29°30'.07N, 34°55'.02E), (Figure 1). N/A- Not Available, Field ID - temporary identification code for sample as given in the field before assigning final voucher number \* - in parentheses original scientific name, \*\*- Veron (2000) volume 3, page 447, bold number- transition to genus.

| VOUCHER<br>NUMBER | SPECIES NAME                         | TAXON<br>AUTHOR   | SAMPLE<br>SESSION | SAMPLE<br>SITE | FIELD<br>ID | BOLD<br>PROCESS<br>ID | FIRST<br>DISCRIPTION IN<br>THE RED SEA* | KEY TO GENERA AND<br>SPECIES**                                           |
|-------------------|--------------------------------------|-------------------|-------------------|----------------|-------------|-----------------------|-----------------------------------------|--------------------------------------------------------------------------|
| SIRS-001          | <i>Pocillopora damicornis</i>        | (Ehrenberg, 1834) | 1                 | DEK            | DEK-001     | SIRS001-13            | Mergner & Schuhmacher (1981)            | Pocilloporidae:1,1                                                       |
| SIRS-002          | <i>Pocillopora damicornis</i>        | (Ehrenberg, 1834) | 1                 | DEK            | DEK-002     | SIRS002-15            | Mergner & Schuhmacher (1981)            | Pocilloporidae:1,1                                                       |
| SIRS-003          | <i>Pocillopora damicornis</i>        | (Ehrenberg, 1834) | 1                 | DEK            | DEK-003     | SIRS003-15            | Mergner & Schuhmacher (1981)            | Pocilloporidae:1,1                                                       |
| SIRS-004          | <i>Pocillopora damicornis</i>        | (Ehrenberg, 1834) | 1                 | DEK            | DEK-004     | SIRS004-15            | Mergner & Schuhmacher (1981)            | Pocilloporidae:1,1                                                       |
| SIRS-005          | <i>Stylophora pistillata</i>         | (Esper, 1792)     | 1                 | DEK            | DEK-005     | SIRS005-15            | Loya & Slobodkin (1971)                 | Pocilloporidae:2,2,1,1,1                                                 |
| SIRS-006          | <i>Stylophora pistillata</i>         | (Esper, 1792)     | 1                 | DEK            | DEK-006     | SIRS006-15            | Loya & Slobodkin (1971)                 | Pocilloporidae:2,2,1,1,1                                                 |
| SIRS-007          | <i>Stylophora pistillata</i>         | (Esper, 1792)     | 1                 | DEK            | DEK-007     | SIRS007-15            | Loya & Slobodkin (1971)                 | Pocilloporidae:2,2,1,1,1                                                 |
| SIRS-008          | <i>Stylophora pistillata</i>         | (Esper, 1792)     | 1                 | DEK            | DEK-008     | SIRS008-15            | Loya & Slobodkin (1971)                 | Pocilloporidae:2,2,1,1,1                                                 |
| SIRS-009          | <i>Acropora tenuis</i>               | (Dana, 1846)      | 1                 | KIS            | KIS-009     | SIRS009-15            | Scheer & Pillai (1983)                  | Acroporidae:2,2,5,3,1,1                                                  |
| SIRS-010          | <i>Acropora tenuis</i>               | (Dana, 1846)      | 1                 | KIS            | KIS-010     | SIRS010-15            | Scheer & Pillai (1983)                  | Acroporidae:2,2,5,3,1,1                                                  |
| SIRS-011          | <i>Acropora tenuis</i>               | (Dana, 1846)      | 1                 | KIS            | KIS-011     | SIRS011-15            | Scheer & Pillai (1983)                  | Acroporidae:2,2,5,3,1,1                                                  |
| SIRS-012          | <i>Acropora tenuis</i>               | (Dana, 1846)      | 1                 | KIS            | KIS-012     | SIRS012-15            | Scheer & Pillai (1983)                  | Acroporidae:2,2,5,3,1,1                                                  |
| SIRS-013          | <i>Acropora</i> sp.1                 | Oken, 1815        | 1                 | KIS            | KIS-013     | SIRS013-15            | N/A                                     | Acroporidae:2,2 (Too young to have adequate characteristics)             |
| SIRS-014          | <i>Acropora</i> cf. <i>squarrosa</i> | (Ehrenberg, 1834) | 1                 | KIS            | KIS-014     | SIRS014-15            | Mergner & Schuhmacher (1974)            | Acroporidae:2,2,7,2,1,1,2,1 (Too young to have adequate characteristics) |

|                 |                                 |                               |   |     |         |            |                                                            |                                                                          |
|-----------------|---------------------------------|-------------------------------|---|-----|---------|------------|------------------------------------------------------------|--------------------------------------------------------------------------|
| <b>SIRS-015</b> | <i>Acropora cf. plantaginea</i> | (Lamarck, 1816)               | 1 | KIS | KIS-015 | SIRS015-15 | Scheer & Pillai (1983)<br>( <i>Madrepora plantaginea</i> ) | Acroporidae:2,2,7,2,1,1,2,2 (Too young to have adequate characteristics) |
| <b>SIRS-016</b> | <i>Cycloseris cyclolites</i>    | (Lamarck, 1815)               | 1 | KIS | KIS-016 | SIRS016-15 | Scheer & Pillai (1983)                                     | Fungiidae:1,1,1,1,1,1,1,1                                                |
| <b>SIRS-017</b> | <i>Cycloseris cyclolites</i>    | (Lamarck, 1815)               | 1 | KIS | KIS-017 | SIRS017-15 | Scheer & Pillai (1983)                                     | Fungiidae:1,1,1,1,1,1,1,1                                                |
| <b>SIRS-018</b> | <i>Porites nodifera</i>         | Klunzinger, 1879              | 2 | DEK | DEK-019 | SIRS018-15 | Scheer & Pillai (1983)                                     | Poritidae:1,1,2,1,1,2                                                    |
| <b>SIRS-019</b> | <i>Porites lutea</i>            | Quoy & Gaimard, 1833          | 2 | DEK | DEK-020 | SIRS019-15 | Loya & Slobodkin (1971)                                    | Poritidae:1,1,1,2,2,1,2                                                  |
| <b>SIRS-020</b> | <i>Porites harrisoni</i>        | Veron, 2000                   | 2 | DEK | DEK-021 | SIRS020-15 | Veron (2000)                                               | Poritidae:1,1,5,2,1,2,2,1                                                |
| <b>SIRS-021</b> | <i>Acropora valida</i>          | (Dana, 1846)                  | 2 | DEK | DEK-022 | SIRS021-15 | Scheer & Pillai (1983)                                     | Acroporidae:2,2,6,1,2,1,2                                                |
| <b>SIRS-022</b> | <i>Porites lutea</i>            | Quoy & Gaimard, 1833          | 2 | DEK | DEK-023 | SIRS022-15 | Loya & Slobodkin (1971)                                    | Poritidae:1,1,1,2,2,1,2                                                  |
| <b>SIRS-023</b> | <i>Turbinaria reniformis</i>    | Bernard, 1896                 | 2 | DEK | DEK-024 | SIRS023-15 | Veron (2000)                                               | Dendrophylliidae:1,1,1,1,2,1,1,1                                         |
| <b>SIRS-024</b> | Fungiidae 1                     | Dana, 1846                    | 2 | DEK | DEK-025 | SIRS024-15 | N/A                                                        | Too young to have adequate characteristics                               |
| <b>SIRS-025</b> | <i>Turbinaria reniformis</i>    | Bernard, 1896                 | 2 | DEK | DEK-026 | SIRS025-15 | Veron (2000)                                               | Dendrophylliidae:1,1,1,1,2,1,1,1                                         |
| <b>SIRS-026</b> | <i>Turbinaria reniformis</i>    | Bernard, 1896                 | 2 | DEK | DEK-027 | SIRS026-15 | Veron (2000)                                               | Dendrophylliidae:1,1,1,1,2,1,1,1                                         |
| <b>SIRS-027</b> | Fungiidae 2                     | Dana, 1846                    | 2 | DEK | DEK-028 | SIRS027-15 | N/A                                                        | Too young to have adequate characteristics                               |
| <b>SIRS-028</b> | <i>Seriatopora hystrix</i>      | Dana, 1846                    | 2 | DEK | DEK-029 | SIRS028-15 | Loya & Slobodkin (1971) ( <i>Seriatopora angulata</i> )    | Pocilloporidae:2,1,2,1                                                   |
| <b>SIRS-029</b> | <i>Dipsastraea danai</i>        | (Milne Edwards & Haime, 1857) | 2 | DEK | DEK-030 | SIRS029-15 | Scheer & Pillai (1983) ( <i>Favia danae</i> )              | Faviidae:3,1,1,1,3,2,1,1,1                                               |
| <b>SIRS-030</b> | <i>Pavona varians</i>           | (Verrill, 1864)               | 2 | DEK | DEK-031 | SIRS030-15 | Loya & Slobodkin (1971)                                    | Agariciidae:1,1,2,1,2,2                                                  |
| <b>SIRS-031</b> | <i>Platygyra crosslandi</i>     | (Matthai, 1928)               | 2 | DEK | DEK-032 | SIRS031-15 | Scheer & Pillai (1983)                                     | Faviidae:3,1,2,2,1,1,1,1,2,1                                             |
| <b>SIRS-032</b> | <i>Favites pentagona</i>        | (Esper, 1790)                 | 2 | DEK | DEK-033 | SIRS032-15 | Loya & Slobodkin (1971)                                    | Faviidae:3,1,2,1,1,2,1,1                                                 |
| <b>SIRS-033</b> | <i>Montipora tuberculosa</i>    | (Lamarck, 1816)               | 2 | DEK | DEK-034 | SIRS033-15 | Loya & Slobodkin (1971)                                    | Acroporidae:1,1,2,2,1,1,2,2                                              |
| <b>SIRS-034</b> | <i>Montipora tuberculosa</i>    | (Lamarck, 1816)               | 2 | DEK | DEK-035 | SIRS034-15 | Loya & Slobodkin (1971)                                    | Acroporidae:1,1,2,2,1,1,2,2                                              |
| <b>SIRS-035</b> | <i>Montipora informis</i>       | Bernard, 1897                 | 2 | DEK | DEK-036 | SIRS035-15 | Loya & Slobodkin                                           | Acroporidae:1,1,2,2,1,2,1,2,2,1                                          |

|                 |                                 |                         |   |     |         |            |                                                            |                                                                                                               |
|-----------------|---------------------------------|-------------------------|---|-----|---------|------------|------------------------------------------------------------|---------------------------------------------------------------------------------------------------------------|
|                 |                                 |                         |   |     |         |            | (1971) ( <i>Montipora granulata</i> )                      |                                                                                                               |
| <b>SIRS-036</b> | <i>Lobophyllia corymbosa</i>    | (Forskål, 1775)         | 2 | DEK | DEK-038 | SIRS036-15 | Loya & Slobodkin (1971)                                    | Mussidea:1,2,3, <b>1</b> ,1,1,2,2                                                                             |
| <b>SIRS-037</b> | <i>Pavona varians</i>           | (Verrill, 1864)         | 2 | DEK | DEK-039 | SIRS037-15 | Loya & Slobodkin (1971)                                    | Agariciidae:1,1, <b>2</b> ,1,2,2                                                                              |
| <b>SIRS-038</b> | <i>Alveopora fenestrata</i>     | (Lamarck, 1816)         | 2 | DEK | DEK-041 | SIRS038-15 | Veron (2000)                                               | Poritidae:2, <b>2</b> ,2,1,2,1                                                                                |
| <b>SIRS-039</b> | <i>Alveopora fenestrata</i>     | (Lamarck, 1816)         | 2 | DEK | DEK-042 | SIRS039-15 | Veron (2000)                                               | Poritidae:2, <b>2</b> ,2,1,2,1                                                                                |
| <b>SIRS-040</b> | <i>Galaxea fascicularis</i>     | (Linnaeus, 1767)        | 2 | DEK | DEK-043 | SIRS040-15 | Loya & Slobodkin (1971)                                    | Oculinidea: <b>2</b> ,1,1                                                                                     |
| <b>SIRS-041</b> | <i>Galaxea fascicularis</i>     | (Linnaeus, 1767)        | 2 | DEK | DEK-044 | SIRS041-15 | Loya & Slobodkin (1971)                                    | Oculinidea: <b>2</b> ,1,1                                                                                     |
| <b>SIRS-042</b> | <i>Galaxea fascicularis</i>     | (Linnaeus, 1767)        | 2 | DEK | DEK-045 | SIRS042-15 | Loya & Slobodkin (1971)                                    | Oculinidea: <b>2</b> ,1,1                                                                                     |
| <b>SIRS-043</b> | <i>Mycedium umbra</i>           | Veron, 2000             | 2 | DEK | DEK-046 | SIRS043-15 | Veron (2000)                                               | Pectiniidea:1,2,2, <b>2</b> ,1,1                                                                              |
| <b>SIRS-044</b> | <i>Cyphastrea microphthalma</i> | (Lamarck, 1816)         | 2 | DEK | DEK-047 | SIRS044-15 | Loya & Slobodkin (1971)                                    | Faviidae:3,2,1, <b>1</b> ,1,2                                                                                 |
| <b>SIRS-045</b> | <i>Cyphastrea microphthalma</i> | (Lamarck, 1816)         | 2 | DEK | DEK-048 | SIRS045-15 | Loya & Slobodkin (1971)                                    | Faviidae:3,2,1, <b>1</b> ,1,2                                                                                 |
| <b>SIRS-046</b> | <i>Pavona danai</i>             | (Milne Edwards, 1860)   | 2 | DEK | DEK-049 | SIRS046-15 | Mergner (1984) ( <i>Pavona danae</i> )                     | Agariciidae:1,1, <b>2</b> ,1,1,1,1                                                                            |
| <b>SIRS-047</b> | <i>Pavona</i> sp.               | Lamarck, 1801           | 2 | DEK | DEK-050 | SIRS047-15 | N/A                                                        | Agariciidae:1,1, <b>2</b> ,                                                                                   |
| <b>SIRS-048</b> | <i>Galaxea fascicularis</i>     | (Linnaeus, 1767)        | 2 | DEK | DEK-051 | SIRS048-15 | Loya & Slobodkin (1971)                                    | Oculinidea: <b>2</b> ,1,1                                                                                     |
| <b>SIRS-049</b> | <i>Leptoseris yabei</i>         | (Pillai & Scheer, 1976) | 2 | DEK | DEK-052 | SIRS049-15 | Scheer & Pillai (1983)                                     | Agariciidae:1,1,1, <b>2</b> ,2,2,2                                                                            |
| <b>SIRS-050</b> | <i>Cycloseris fragilis</i>      | (Alcock, 1893)          | 2 | KIS | KIS-053 | SIRS050-15 | Scheer & Pillai (1983) ( <i>Cycloseris patelliformis</i> ) | Fungiidae:1,1,1,1, <b>2</b> ,1                                                                                |
| <b>SIRS-051</b> | <i>Oxypora cf. lacera</i>       | (Verrill, 1864)         | 2 | KIS | KIS-054 | SIRS051-15 | Scheer & Pillai (1983)                                     | Pectiniidae:1,2, <b>1</b> ,2,2,1 (Ccolony texture too compact at sample area to observe full characteristics) |
| <b>SIRS-052</b> | <i>Plerogyra sinuosa</i>        | (Dana, 1846)            | 2 | KIS | KIS-056 | SIRS052-15 | Loya & Slobodkin (1971)                                    | Euphyllidae:2, <b>1</b> ,2,1                                                                                  |

|                 |                               |                               |   |     |          |            |                                                        |                                           |
|-----------------|-------------------------------|-------------------------------|---|-----|----------|------------|--------------------------------------------------------|-------------------------------------------|
| <b>SIRS-053</b> | <i>Platygyra lamellina</i>    | (Ehrenberg, 1834)             | 2 | KIS | KIS-057  | SIRS053-15 | Loya & Slobodkin (1971)                                | Faviidae:3,1,2,2,1, <b>1</b> ,2,1         |
| <b>SIRS-054</b> | <i>Dipsastraea danai</i>      | (Milne Edwards & Haime, 1857) | 2 | KIS | KIS-058  | SIRS054-15 | Scheer & Pillai (1983) ( <i>Favia danai</i> )          | Faviidae:3,1,1, <b>1</b> ,3,2,1,1,1       |
| <b>SIRS-055</b> | <i>Turbinaria reniformis</i>  | Bernard, 1896                 | 2 | KIS | KIS-059T | SIRS194-15 | Veron (2000)                                           | Dendrophylliidae:1, <b>1</b> ,1,1,2,1,1,1 |
| <b>SIRS-056</b> | <i>Dipsastraea laxa</i>       | (Klunzinger, 1879)            | 2 | KIS | KIS-060  | SIRS195-15 | Loya & Slobodkin (1971) ( <i>Plesiastrea laxa</i> )    | Faviidae:3,1,1, <b>1</b> ,1,2,2           |
| <b>SIRS-057</b> | <i>Pocillopora damicornis</i> | (Ehrenberg, 1834)             | 2 | KIS | KIS-059P | SIRS193-15 | Mergner & Schuhmacher (1981)                           | Pocilloporidae: <b>1</b> ,1               |
| <b>SIRS-058</b> | <i>Fungia fungites</i>        | (Linnaeus, 1758)              | 2 | KIS | KIS-062  | SIRS055-15 | Loya & Slobodkin (1971)                                | Fungiidae:1,1,1,2, <b>1</b> ,1,2          |
| <b>SIRS-059</b> | <i>Platygyra daedalea</i>     | (Ellis & Solander, 1786)      | 2 | KIS | KIS-063  | SIRS056-15 | Loya & Slobodkin (1971) ( <i>Platygyra rustica</i> )   | Faviidae:3,1,2,2,1, <b>1</b> ,2,2,2,1     |
| <b>SIRS-060</b> | <i>Plerogyra sinuosa</i>      | (Dana, 1846)                  | 2 | KIS | KIS-064  | SIRS057-15 | Loya & Slobodkin (1971)                                | Euphyllidae:2, <b>1</b> ,2,1              |
| <b>SIRS-061</b> | <i>Lobophyllia hemprichii</i> | (Ehrenberg, 1834)             | 2 | KIS | KIS-065  | SIRS058-15 | Loya & Slobodkin (1971)                                | Mussidae:1,2,3, <b>1</b> ,2,1,2,2         |
| <b>SIRS-062</b> | <i>Dipsastraea speciosa</i>   | (Dana, 1846)                  | 2 | KIS | KIS-066  | SIRS059-15 | Loya & Slobodkin (1971) ( <i>Favia speciosa</i> )      | Faviidae:3,1,1, <b>1</b> ,2,1,2,2         |
| <b>SIRS-063</b> | <i>Montipora maeandrina</i>   | (Ehrenberg, 1834)             | 2 | KIS | KIS-067  | SIRS060-15 | Loya & Slobodkin (1971) ( <i>Montipora meandrina</i> ) | Acroporidae:1,1, <b>2</b> ,3,2,1,3,2,2,1  |
| <b>SIRS-064</b> | <i>Plerogyra sinuosa</i>      | (Dana, 1846)                  | 2 | KIS | KIS-068  | SIRS061-15 | Loya & Slobodkin (1971)                                | Euphyllidae:2, <b>1</b> ,2,1              |
| <b>SIRS-065</b> | <i>Galaxea fascicularis</i>   | (Linnaeus, 1767)              | 2 | KIS | KIS-070  | SIRS062-15 | Loya & Slobodkin (1971)                                | Oculinidea: <b>2</b> ,1,1                 |
| <b>SIRS-066</b> | <i>Mycedium umbra</i>         | Veron, 2000                   | 2 | KIS | KIS-073  | SIRS063-15 | Veron (2000)                                           | Pectiniidea:1,2,2, <b>2</b> ,1,1          |
| <b>SIRS-067</b> | <i>Plerogyra sinuosa</i>      | (Dana, 1846)                  | 2 | KIS | KIS-076  | SIRS064-15 | Loya & Slobodkin (1971)                                | Euphyllidae:2, <b>1</b> ,2,1              |
| <b>SIRS-068</b> | <i>Paramontastraea peresi</i> | (Faure & Pichon, 1978)        | 2 | DEK | DEK-077  | SIRS065-15 | Mergner & Schuhmacher (1981) ( <i>Favites peresi</i> ) | Faviidae:3,1,2,1,2, <b>1</b> ,1,2,2,2,1   |
| <b>SIRS-069</b> | <i>Seriatopora hystrix</i>    | Dana, 1846                    | 2 | KIS | KIS-078  | SIRS066-15 | Loya & Slobodkin                                       | Pocilloporidae:2,1,2,1                    |

|                 |                               |                          |   |     |         |            |                                                           |                                                                                                          |
|-----------------|-------------------------------|--------------------------|---|-----|---------|------------|-----------------------------------------------------------|----------------------------------------------------------------------------------------------------------|
|                 |                               |                          |   |     |         |            | (1971) ( <i>Seriatopora angulata</i> )                    |                                                                                                          |
| <b>SIRS-070</b> | <i>Seriatopora hystrix</i>    | Dana, 1846               | 2 | KIS | KIS-079 | SIRS067-15 | Loya & Slobodkin (1971) ( <i>Seriatopora angulata</i> )   | Pocilloporidae:2,1,2,1                                                                                   |
| <b>SIRS-071</b> | <i>Hydnophora exesa</i>       | (Pallas, 1766)           | 2 | KIS | KIS-080 | SIRS068-15 | Loya & Slobodkin (1971) ( <i>Hydnophora contignatio</i> ) | Merulinidae:1,2,1,2,2                                                                                    |
| <b>SIRS-072</b> | <i>Platygyra carnosa</i>      | Veron, 2000              | 2 | KIS | KIS-081 | SIRS069-15 | Veron (2000) ( <i>Platygyra carnosus</i> )                | Faviidae:3,1,2,2,1,1,1,2,2,1                                                                             |
| <b>SIRS-073</b> | <i>Favites pentagona</i>      | (Esper, 1790)            | 2 | KIS | KIS-082 | SIRS070-15 | Loya & Slobodkin (1971)                                   | Faviidae:3,1,2,1,1,2,1,1                                                                                 |
| <b>SIRS-074</b> | <i>Seriatopora hystrix</i>    | Dana, 1846               | 2 | KIS | KIS-083 | SIRS071-15 | Loya & Slobodkin (1971) ( <i>Seriatopora angulata</i> )   | Pocilloporidae:2,1,2,1                                                                                   |
| <b>SIRS-075</b> | <i>Hydnophora exesa</i>       | (Pallas, 1766)           | 2 | KIS | KIS-084 | SIRS072-15 | Loya & Slobodkin (1971) ( <i>Hydnophora contignatio</i> ) | Faviidae:3,1,2,1,1,2,1,1                                                                                 |
| <b>SIRS-076</b> | <i>Hydnophora exesa</i>       | (Pallas, 1766)           | 2 | KIS | KIS-085 | SIRS073-15 | Loya & Slobodkin (1971) ( <i>Hydnophora contignatio</i> ) | Faviidae:3,1,2,1,1,2,1,1                                                                                 |
| <b>SIRS-077</b> | Fungiidae 3                   | Dana, 1846               | 2 | KIS | KIS-086 | SIRS074-15 | N/A                                                       | Too young to have adequate characteristics                                                               |
| <b>SIRS-078</b> | <i>Mycedium umbra</i>         | Veron, 2000              | 2 | KIS | KIS-087 | SIRS075-15 | Veron (2000)                                              | Pectiniidea:1,2,2,2,1,1                                                                                  |
| <b>SIRS-079</b> | <i>Paramontastraea peresi</i> | (Faure & Pichon, 1978)   | 2 | KIS | KIS-088 | SIRS076-15 | Mergner & Schuhmacher (1981) ( <i>Favites peresi</i> )    | Faviidae:3,1,2,1,2,1,1,2,2,2,1                                                                           |
| <b>SIRS-080</b> | <i>Cyphastrea magna</i>       | Benzoni & Arrigoni, 2017 | 2 | KIS | KIS-090 | SIRS078-15 | Arrigoni et al. (2017)                                    | Faviidae:3,2,1,1,1,1,2 (Identified as <i>C. chalcidicum</i> redefined according Arrigoni et al., (2017)) |
| <b>SIRS-081</b> | <i>Paramontastraea peresi</i> | (Faure & Pichon, 1978)   | 2 | KIS | KIS-091 | SIRS079-15 | Mergner & Schuhmacher (1981) ( <i>Favites peresi</i> )    | Faviidae:3,1,2,1,2,1,1,2,2,2,1                                                                           |
| <b>SIRS-082</b> | <i>Lobophyllia corymbosa</i>  | (Forskål, 1775)          | 2 | KIS | KIS-093 | SIRS080-15 | Loya & Slobodkin (1971)                                   | Mussidea:1,2,3,1,1,1,1,2,2                                                                               |

|                 |                                    |                               |   |     |         |            |                                                           |                                                                                                                                                                                                                                                                  |
|-----------------|------------------------------------|-------------------------------|---|-----|---------|------------|-----------------------------------------------------------|------------------------------------------------------------------------------------------------------------------------------------------------------------------------------------------------------------------------------------------------------------------|
| <b>SIRS-083</b> | <i>Sclerophyllia margariticola</i> | Klunzinger, 1879              | 2 | KIS | KIS-094 | SIRS081-15 | Arrigoni et al. (2015)                                    | Mussidea:1,2,3, <b>1</b> ,1,1,1,2 (Single polyp) Mussidea:2,2, <b>1</b> (Septal teeth pointed vs. lobed, pointed goes to <i>Scolymia</i> which does not occur in the Red Sea) (I.D. according to genetic marker confirmed morphology by Arrigoni et al., (2015)) |
| <b>SIRS-084</b> | <i>Oxypora cf. crassispinosa</i>   | Nemenzo, 1979                 | 2 | KIS | KIS-096 | SIRS082-15 | Veron (2000)                                              | Pectiniidae:1,2, <b>1</b> ,1 (Too young to have adequate characteristics)                                                                                                                                                                                        |
| <b>SIRS-085</b> | <i>Montipora verrucosa</i>         | (Lamarck, 1816)               | 2 | KIS | KIS-098 | SIRS083-15 | Loya & Slobodkin (1971)                                   | Acroporidae:1,1, <b>2</b> ,3,2,1,3,2,1                                                                                                                                                                                                                           |
| <b>SIRS-086</b> | <i>Echinophyllia aspera</i>        | (Ellis & Solander, 1786)      | 2 | KIS | KIS-099 | SIRS084-15 | Loya & Slobodkin (1971)                                   | Pectiniidea:1,2,2, <b>1</b> ,2,2,2,1                                                                                                                                                                                                                             |
| <b>SIRS-087</b> | <i>Lobophyllia corymbosa</i>       | (Forskål, 1775)               | 2 | KIS | KIS-101 | SIRS085-15 | Loya & Slobodkin (1971)                                   | Mussidea:1,2,3, <b>1</b> ,1,1,1,2,2                                                                                                                                                                                                                              |
| <b>SIRS-088</b> | <i>Hydnophora exesa</i>            | (Pallas, 1766)                | 2 | KIS | KIS-102 | SIRS086-15 | Loya & Slobodkin (1971) ( <i>Hydnophora contignatio</i> ) | Merulinidae: <b>1</b> ,2,1,2,2                                                                                                                                                                                                                                   |
| <b>SIRS-089</b> | <i>Mycedium umbra</i>              | Veron, 2000                   | 2 | KIS | KIS-103 | SIRS087-15 | Veron (2000)                                              | Pectiniidea:1,2,2, <b>2</b> ,1,1                                                                                                                                                                                                                                 |
| <b>SIRS-090</b> | <i>Oxypora lacera</i>              | (Verrill, 1864)               | 2 | KIS | KIS-104 | SIRS088-15 | Scheer & Pillai (1983)                                    | Pectiniidae:1,2, <b>1</b> ,2,2,1                                                                                                                                                                                                                                 |
| <b>SIRS-091</b> | <i>Lobophyllia corymbosa</i>       | (Forskål, 1775)               | 2 | KIS | KIS-105 | SIRS089-15 | Loya & Slobodkin (1971)                                   | Mussidea:1,2,3, <b>1</b> ,1,1,1,2,2                                                                                                                                                                                                                              |
| <b>SIRS-092</b> | <i>Plesiastrea versipora</i>       | (Lamarck, 1816)               | 2 | KIS | KIS-106 | SIRS090-15 | Loya & Slobodkin (1971) ( <i>Plesiastrea mammosa</i> )    | Faviidae:3,2,1, <b>2</b> ,1                                                                                                                                                                                                                                      |
| <b>SIRS-093</b> | <i>Blastomussa merleti</i>         | (Wells, 1961)                 | 2 | KIS | KIS-107 | SIRS091-15 | Scheer & Pillai (1983)                                    | Mussidea:1,1, <b>1</b> ,1                                                                                                                                                                                                                                        |
| <b>SIRS-094</b> | <i>Paramontastraea peresi</i>      | (Faure & Pichon, 1978)        | 2 | KIS | KIS-108 | SIRS092-15 | Mergner & Schuhmacher (1981) ( <i>Favites peresi</i> )    | Faviidae:3,1,2,1,2, <b>1</b> ,1,2,2,2,1                                                                                                                                                                                                                          |
| <b>SIRS-095</b> | <i>Dipsastraea danai</i>           | (Milne Edwards & Haime, 1857) | 2 | KIS | KIS-109 | SIRS093-15 | Scheer & Pillai (1983) ( <i>Favia danae</i> )             | Faviidae:3,1,1, <b>1</b> ,3,2,1,1,1                                                                                                                                                                                                                              |
| <b>SIRS-096</b> | <i>Dipsastraea amicornum</i>       | (Milne Edwards & Haime, 1849) | 2 | KIS | KIS-110 | SIRS094-15 | Mergner & Schuhmacher (1974) ( <i>Favia amicornum</i> )   | Faviidae:3,1,1, <b>2</b> ,2                                                                                                                                                                                                                                      |
| <b>SIRS-097</b> | <i>Hydnophora exesa</i>            | (Pallas, 1766)                | 2 | KIS | KIS-111 | SIRS095-15 | Loya & Slobodkin                                          | Faviidae:3,1,2,1, <b>1</b> ,2,1,1                                                                                                                                                                                                                                |

|          |                                      |                                |   |     |         |            |                                                        |                                                                                                 |
|----------|--------------------------------------|--------------------------------|---|-----|---------|------------|--------------------------------------------------------|-------------------------------------------------------------------------------------------------|
|          |                                      |                                |   |     |         |            | (1971) ( <i>Hydnophora contignatio</i> )               |                                                                                                 |
| SIRS-098 | <i>Echinopora</i> sp.                | Lamarck, 1816                  | 3 | DEK | DEK-115 | SIRS096-15 | N/A                                                    | Faviidae:4 (Colony texture too compact at sample area to observe full characteristics)          |
| SIRS-099 | <i>Acropora</i> cf. <i>squarrosa</i> | (Ehrenberg, 1834)              | 3 | DEK | DEK-116 | SIRS097-15 | Mergner & Schuhmacher (1974)                           | Acroporidae:2,2,7,2,1,1,2,1 (Too young to have adequate characteristics)                        |
| SIRS-100 | <i>Montipora efflorescens</i>        | Bernard, 1897                  | 3 | DEK | DEK-117 | SIRS098-15 | Veron (2000)                                           | Acroporidae:1,1,2,2,1,2,1,1,1,1,2                                                               |
| SIRS-101 | <i>Montipora informis</i>            | Bernard, 1897                  | 3 | DEK | DEK-118 | SIRS099-15 | Loya & Slobodkin (1971) ( <i>Montipora granulata</i> ) | Acroporidae:1,1,2,2,1,2,1,2,2,1                                                                 |
| SIRS-102 | <i>Montipora cryptus</i>             | Veron, 2000                    | 3 | DEK | DEK-119 | SIRS100-15 | Veron (2000)                                           | Acroporidae:1,1,2,2,2,1,1                                                                       |
| SIRS-103 | <i>Acropora</i> sp.2                 | Oken, 1815                     | 3 | DEK | DEK-120 | SIRS101-15 | N/A                                                    | Acroporidae:2,2 (Too young to have adequate characteristics)                                    |
| SIRS-104 | <i>Echinopora irregularis</i>        | Veron, Turak & DeVantier, 2000 | 3 | DEK | DEK-122 | SIRS102-15 | Veron (2000)                                           | Faviidae:4,2,1,1,2,2,1                                                                          |
| SIRS-105 | <i>Echinopora irregularis</i>        | Veron, Turak & DeVantier, 2000 | 3 | DEK | DEK-123 | SIRS103-15 | Veron (2000)                                           | Faviidae:4,2,1,1,2,2,1                                                                          |
| SIRS-106 | <i>Danafungia horrida</i>            | (Dana, 1846)                   | 3 | DEK | DEK-125 | SIRS105-15 | Scheer & Pillai (1983) ( <i>Fungia horrida</i> )       | Fungiidae:1,1,1,2,1,1,1,2,2,1                                                                   |
| SIRS-107 | <i>Echinopora irregularis</i>        | Veron, Turak & DeVantier, 2000 | 3 | DEK | DEK-126 | SIRS106-15 | Veron (2000)                                           | Faviidae:4,2,1,1,2,2,1                                                                          |
| SIRS-108 | <i>Paramontastraea peresi</i>        | (Faure & Pichon, 1978)         | 3 | DEK | DEK-127 | SIRS107-15 | Mergner & Schuhmacher (1981) ( <i>Favites peresi</i> ) | Faviidae:3,1,2,1,2,1,1,2,2,2,1                                                                  |
| SIRS-109 | <i>Platygyra lamellina</i>           | (Ehrenberg, 1834)              | 3 | DEK | DEK-128 | SIRS108-15 | Loya & Slobodkin (1971)                                | Faviidae:3,1,2,2,1,1,2,1                                                                        |
| SIRS-110 | <i>Echinophyllia</i> sp.             | Dai & Horng, 2009              | 3 | DEK | DEK-129 | SIRS109-15 | N/A                                                    | Pectiniidea:1,2,2,1 (Colony texture too compact at sample area to observe full characteristics) |
| SIRS-111 | <i>Platygyra crosslandi</i>          | (Matthai, 1928)                | 3 | DEK | DEK-130 | SIRS110-15 | Scheer & Pillai (1983)                                 | Faviidae:3,1,2,2,1,1,1,1,2,1                                                                    |
| SIRS-112 | <i>Dipsastraea faviaformis</i>       | (Veron, 2000)                  | 3 | DEK | DEK-131 | SIRS111-15 | Veron (2000) ( <i>Acanthastrea faviaformis</i> )       | Mussidea:1,2,1,1,1,1,1,2,1                                                                      |

|                 |                                  |                               |   |     |         |            |                                                         |                                                                                                                                                |
|-----------------|----------------------------------|-------------------------------|---|-----|---------|------------|---------------------------------------------------------|------------------------------------------------------------------------------------------------------------------------------------------------|
| <b>SIRS-113</b> | <i>Platygyra carnosa</i>         | Veron, 2000                   | 3 | DEK | DEK-132 | SIRS112-15 | Veron (2000) ( <i>Platygyra carnosus</i> )              | Faviidae:3,1,2,2,1, <b>1</b> ,1,2,2,1                                                                                                          |
| <b>SIRS-114</b> | <i>Pavona diffluens</i>          | (Lamarck, 1816)               | 3 | DEK | DEK-133 | SIRS113-15 | Scheer & Pillai (1983) ( <i>Pavona cf. diffillens</i> ) | Agariciidae:1,1, <b>2</b> ,2,2,1,2,2                                                                                                           |
| <b>SIRS-115</b> | <i>Montipora maeandrina</i>      | (Ehrenberg, 1834)             | 3 | DEK | DEK-134 | SIRS114-15 | Loya & Slobodkin (1971) ( <i>Montipora meandrina</i> )  | Acroporidae:1,1, <b>2</b> ,3,2,1,3,2,2,1                                                                                                       |
| <b>SIRS-116</b> | <i>Montipora maeandrina</i>      | (Ehrenberg, 1834)             | 3 | DEK | DEK-135 | SIRS115-15 | Loya & Slobodkin (1971) ( <i>Montipora meandrina</i> )  | Acroporidae:1,1, <b>2</b> ,3,2,1,3,2,2,1                                                                                                       |
| <b>SIRS-117</b> | Fungiidae 4                      | Lamarck, 1801                 | 3 | DEK | DEK-136 | SIRS116-15 | N/A                                                     | Too young to have adequate characteristics                                                                                                     |
| <b>SIRS-118</b> | <i>Dipsastraea laxa</i>          | (Klunzinger, 1879)            | 3 | DEK | DEK-137 | SIRS117-15 | Loya & Slobodkin (1971) ( <i>Plesiastrea laxa</i> )     | Faviidae:3,1,1, <b>1</b> ,1,2,2                                                                                                                |
| <b>SIRS-119</b> | <i>Dipsastraea amicornum</i>     | (Milne Edwards & Haime, 1849) | 3 | DEK | DEK-138 | SIRS118-15 | Mergner & Schuhmacher (1974) ( <i>Favia amicornum</i> ) | Faviidae:3,1,1, <b>2</b> ,2                                                                                                                    |
| <b>SIRS-120</b> | <i>Echinophyllia aspera</i>      | (Ellis & Solander, 1786)      | 3 | DEK | DEK-139 | SIRS119-15 | Mergner & Schuhmacher (1974)                            | Pectiniidea:1,2,2, <b>1</b> ,2,2,2,1                                                                                                           |
| <b>SIRS-121</b> | <i>Goniopora pearsoni</i>        | Veron, 2000                   | 3 | DEK | DEK-141 | SIRS120-15 | Veron (2000)                                            | Poritidae:2, <b>1</b> ,1,2,1,2,2                                                                                                               |
| <b>SIRS-122</b> | <i>Blastomussa loyai</i>         | Head, 1978                    | 3 | DEK | DEK-142 | SIRS121-15 | Scheer & Pillai (1983) ( <i>Blastomussa loyai</i> )     | Mussidae:1,1, <b>1</b> ,1 (Further ID made according to Kleeman & Baal, (2012))                                                                |
| <b>SIRS-123</b> | <i>Favites cf. paraflexuosus</i> | Veron, 2000                   | 3 | DEK | DEK-143 | SIRS122-15 | Veron (2000) ( <i>Favites paraflexuosa</i> )            | Faviidae:3,1,2,1, <b>1</b> ,4,2,2 (Colony too narrow to determine if corallites are angular or rounded, yet septal teeth were not conspicuous) |
| <b>SIRS-124</b> | <i>Goniopora pearsoni</i>        | Veron, 2000                   | 3 | DEK | DEK-144 | SIRS123-15 | Veron (2000)                                            | Poritidae:2, <b>1</b> ,1,2,1,2,2                                                                                                               |
| <b>SIRS-125</b> | <i>Cycloseris vaughani</i>       | (Boschma, 1923)               | 3 | DEK | DEK-145 | SIRS124-15 | Scheer & Pillai (1983)                                  | Fungiidae:1,1,1,1, <b>1</b> ,1,2,2,1,1                                                                                                         |
| <b>SIRS-126</b> | <i>Porites rus</i>               | (Forskål, 1775)               | 3 | DEK | DEK-146 | SIRS125-15 | Mergner (1984) ( <i>Porites (Synarea) convexa</i> )     | Poritidae:1, <b>1</b> ,4,1,2,1                                                                                                                 |
| <b>SIRS-127</b> | <i>Pavona diffluens</i>          | (Lamarck, 1816)               | 3 | KIS | KIS-151 | SIRS126-15 | Scheer & Pillai (1983) ( <i>Pavona cf. diffillens</i> ) | Agariciidae:1,1, <b>2</b> ,2,2,1,2,2                                                                                                           |



|                 |                                    |                               |   |     |         |            |                                                                                |                                                                                                                                                                                                                                                                  |
|-----------------|------------------------------------|-------------------------------|---|-----|---------|------------|--------------------------------------------------------------------------------|------------------------------------------------------------------------------------------------------------------------------------------------------------------------------------------------------------------------------------------------------------------|
| <b>SIRS-128</b> | <i>Porites rus</i>                 | (Forskål, 1775)               | 3 | KIS | KIS-152 | SIRS127-15 | Mergner (1984)<br>( <i>Porites (Synarea) convexa</i> )                         | Poritidae:1, <b>1</b> ,4,1,2,1                                                                                                                                                                                                                                   |
| <b>SIRS-129</b> | <i>Sclerophyllia margariticola</i> | Klunzinger, 1879              | 3 | KIS | KIS-153 | SIRS128-15 | Arrigoni et al. (2015)                                                         | Mussidae:1,2,3, <b>1</b> ,1,1,1,2 (Single polyp) Mussidae:2,2, <b>1</b> (Septal teeth pointed vs. lobed, pointed goes to <i>Scolymia</i> which does not occur in the Red Sea) (I.D. according to genetic marker confirmed morphology by Arrigoni et al., (2015)) |
| <b>SIRS-130</b> | <i>Acropora cf. squarrosa</i>      | (Ehrenberg, 1834)             | 3 | KIS | KIS-154 | SIRS129-15 | Mergner & Schuhmacher (1974)                                                   | Acroporidae: <b>2</b> ,2,7,2,1,1,2,1 (Too young to have adequate characteristics)                                                                                                                                                                                |
| <b>SIRS-131</b> | <i>Cycloseris vaughani</i>         | (Boschma, 1923)               | 3 | KIS | KIS-155 | SIRS130-15 | Scheer & Pillai (1983)                                                         | Fungiidae:1,1,1,1, <b>1</b> ,1,2,2,1,1                                                                                                                                                                                                                           |
| <b>SIRS-132</b> | <i>Cycloseris vaughani</i>         | (Boschma, 1923)               | 3 | KIS | KIS-157 | SIRS131-15 | Scheer & Pillai (1983)                                                         | Fungiidae:1,1,1,1, <b>1</b> ,1,2,2,1,1                                                                                                                                                                                                                           |
| <b>SIRS-133</b> | <i>Cycloseris vaughani</i>         | (Boschma, 1923)               | 3 | KIS | KIS-160 | SIRS132-15 | Scheer & Pillai (1983)                                                         | Fungiidae:1,1,1,1, <b>1</b> ,1,2,2,1,1                                                                                                                                                                                                                           |
| <b>SIRS-134</b> | <i>Merulina ampliata</i>           | (Ellis & Solander, 1786)      | 3 | KIS | KIS-161 | SIRS133-15 | Mergner (1984)                                                                 | Merulinidae:2,1, <b>2</b> ,2,1                                                                                                                                                                                                                                   |
| <b>SIRS-135</b> | <i>Goniopora tenuidens</i>         | (Quelch, 1886)                | 3 | KIS | KIS-162 | SIRS134-15 | Veron (2000)                                                                   | Poritidae:2, <b>1</b> ,1,2,1,2,1,2,2                                                                                                                                                                                                                             |
| <b>SIRS-136</b> | <i>Montipora hemispherica</i>      | Veron, 2000                   | 3 | KIS | KIS-163 | SIRS135-15 | Veron (2000)                                                                   | Acroporidae:1,1, <b>2</b> ,4,1,2,2                                                                                                                                                                                                                               |
| <b>SIRS-137</b> | <i>Echinopora fruticulosa</i>      | (Ehrenberg, 1834)             | 3 | KIS | KIS-164 | SIRS136-15 | Loya & Slobodkin (1971) ( <i>Echinopora gemmacea</i> var. <i>fruticulosa</i> ) | Faviidae: <b>4</b> ,2,2,1,2                                                                                                                                                                                                                                      |
| <b>SIRS-138</b> | <i>Alveopora daedalea</i>          | (Forskål, 1775)               | 3 | KIS | KIS-165 | SIRS137-15 | Loya & Slobodkin (1971)                                                        | Poritidae:2, <b>2</b> ,2,1,1,1,1,2                                                                                                                                                                                                                               |
| <b>SIRS-139</b> | <i>Acropora cf. plantaginea</i>    | (Lamarck, 1816)               | 3 | KIS | KIS-166 | SIRS138-15 | Scheer & Pillai (1983) ( <i>Madrepora plantaginea</i> )                        | Acroporidae: <b>2</b> ,2,7,2,1,1,2,2 (Too young to have adequate characteristics)                                                                                                                                                                                |
| <b>SIRS-140</b> | <i>Alveopora verrilliana</i>       | Dana, 1846                    | 3 | KIS | KIS-168 | SIRS139-15 | Scheer & Pillai (1983)                                                         | Poritidae:2, <b>2</b> ,1,2                                                                                                                                                                                                                                       |
| <b>SIRS-141</b> | <i>Acropora samoensis</i>          | (Brook, 1891)                 | 3 | DEK | DEK-171 | SIRS140-15 | Veron (2000)                                                                   | Acroporidae: <b>2</b> ,2,3,1,2,1,2                                                                                                                                                                                                                               |
| <b>SIRS-142</b> | <i>Dipsastraea amicornum</i>       | (Milne Edwards & Haime, 1849) | 3 | DEK | DEK-173 | SIRS141-15 | Mergner & Schuhmacher (1974) ( <i>Favia amicornum</i> )                        | Faviidae:3,1,1, <b>2</b> ,2                                                                                                                                                                                                                                      |

|                 |                                 |                                     |   |     |         |            |                                                                                        |                                                                                             |
|-----------------|---------------------------------|-------------------------------------|---|-----|---------|------------|----------------------------------------------------------------------------------------|---------------------------------------------------------------------------------------------|
| <b>SIRS-143</b> | <i>Pavona diffluens</i>         | (Lamarck, 1816)                     | 3 | DEK | DEK-174 | SIRS142-15 | Scheer & Pillai (1983)<br>( <i>Pavona cf. diffillens</i> )                             | Agariciidae:1,1, <b>2</b> ,2,2,1,2,2                                                        |
| <b>SIRS-144</b> | <i>Dipsastraea cf. speciosa</i> | (Dana, 1846)                        | 3 | DEK | DEK-176 | SIRS144-15 | Loya & Slobodkin<br>(1971) ( <i>Favia speciosa</i> )                                   | Faviidae:3,1,1, <b>1</b> ,2,1,2,2                                                           |
| <b>SIRS-145</b> | <i>Dipsastraea lacuna</i>       | (Veron, Turak &<br>DeVantier, 2000) | 3 | DEK | DEK-177 | SIRS145-15 | Veron (2000) ( <i>Favia<br/>lacuna</i> )                                               | Faviidae:3,1,1, <b>1</b> ,2,2,2,1                                                           |
| <b>SIRS-146</b> | <i>Dipsastraea veroni</i>       | (Moll & Best,<br>1984)              | 3 | DEK | DEK-178 | SIRS146-15 | Veron (2000) ( <i>Favia<br/>veroni</i> )                                               | Faviidae:3,1,1, <b>1</b> ,3,2,2                                                             |
| <b>SIRS-147</b> | <i>Favites pentagona</i>        | (Esper, 1790)                       | 3 | DEK | DEK-180 | SIRS148-15 | Loya & Slobodkin<br>(1971)                                                             | Faviidae:3,1,2,1, <b>1</b> ,2,1,1                                                           |
| <b>SIRS-148</b> | <i>Acropora cf. plantaginea</i> | (Lamarck, 1816)                     | 3 | DEK | DEK-181 | SIRS149-15 | Scheer & Pillai (1983)<br>( <i>Madrepora<br/>plantaginea</i> )                         | Acroporidae: <b>2</b> ,2,7,2,1,1,2,2 (Too<br>young to have adequate<br>characteristics)     |
| <b>SIRS-149</b> | <i>Acropora humilis</i>         | (Dana, 1846)                        | 3 | DEK | DEK-185 | SIRS150-15 | Loya & Slobodkin<br>(1971)                                                             | Acroporidae: <b>2</b> ,2,3,1,2,2,1                                                          |
| <b>SIRS-150</b> | <i>Acropora cf. tenuis</i>      | (Dana, 1846)                        | 3 | DEK | DEK-186 | SIRS151-15 | Scheer & Pillai (1983)                                                                 | Acroporidae: <b>2</b> ,2,5,3,1,1 (Too<br>young to have adequate<br>characteristics)         |
| <b>SIRS-151</b> | <i>Cycloseris vaughani</i>      | (Boschma, 1923)                     | 3 | DEK | DEK-187 | SIRS152-15 | Scheer & Pillai (1983)                                                                 | Fungiidae:1,1,1,1, <b>1</b> ,1,2,2,1,1                                                      |
| <b>SIRS-152</b> | <i>Dipsastraea cf. matthaii</i> | (Vaughan, 1918)                     | 4 | IUI | IUI-001 | SIRS153-15 | Mergner &<br>Schuhmacher (1981)<br>( <i>Favia matthaii</i> )                           | Faviidae:3,1,1, <b>1</b> ,2,1,2,1 (colony<br>too narrow to determine if septa<br>are exert) |
| <b>SIRS-153</b> | <i>Cyphastrea serailia</i>      | (Forskål, 1775)                     | 4 | IUI | IUI-002 | SIRS154-15 | Loya & Slobodkin<br>(1971)                                                             | Faviidae:3,2,1, <b>1</b> ,1,1,1,2                                                           |
| <b>SIRS-154</b> | <i>Leptastrea purpurea</i>      | (Dana, 1846)                        | 4 | IUI | IUI-003 | SIRS155-15 | Loya & Slobodkin<br>(1971)                                                             | Faviidae:3,2,2, <b>2</b> ,2,2,2,2                                                           |
| <b>SIRS-155</b> | <i>Dipsastraea speciosa</i>     | (Dana, 1846)                        | 4 | IUI | IUI-004 | SIRS156-15 | Loya & Slobodkin<br>(1971) ( <i>Favia speciosa</i> )                                   | Faviidae:3,1,1, <b>1</b> ,2,1,2,2                                                           |
| <b>SIRS-156</b> | <i>Acropora cytherea</i>        | (Dana, 1846)                        | 4 | IUI | IUI-005 | SIRS157-15 | Mergner &<br>Schuhmacher (1974)<br>( <i>Acropora<br/>(Polystachus)<br/>corymbosa</i> ) | Acroporidae: <b>2</b> ,2,2,2,2,1,1,2                                                        |
| <b>SIRS-157</b> | <i>Dipsastraea danai</i>        | (Milne Edwards<br>& Haime, 1849)    | 4 | IUI | IUI-006 | SIRS158-15 | Scheer & Pillai (1983)<br>( <i>Favia danae</i> )                                       | Faviidae:3,1,1, <b>1</b> ,3,2,1,1,1                                                         |

|                 |                                 |                               |   |     |         |            |                                                                                |                                                                                |
|-----------------|---------------------------------|-------------------------------|---|-----|---------|------------|--------------------------------------------------------------------------------|--------------------------------------------------------------------------------|
| <b>SIRS-158</b> | <i>Dipsastraea cf. matthaii</i> | (Vaughan, 1918)               | 4 | IUI | IUI-007 | SIRS159-15 | Loya & Slobodkin (1971) ( <i>Favia matthaii</i> )                              | Faviidae:3,1,1, <b>1</b> ,2,1,2,1 (Too young to have adequate characteristics) |
| <b>SIRS-159</b> | <i>Dipsastraea danai</i>        | (Milne Edwards & Haime, 1857) | 4 | IUI | IUI-008 | SIRS160-15 | Scheer & Pillai (1983) ( <i>Favia danae</i> )                                  | Faviidae:3,1,1, <b>1</b> ,3,2,1,1,1                                            |
| <b>SIRS-160</b> | <i>Acropora</i> sp.3            | Oken, 1815                    | 4 | IUI | IUI-009 | SIRS161-15 | N/A                                                                            | Acroporidae:2,2 (Too young to have adequate characteristics)                   |
| <b>SIRS-161</b> | <i>Acanthastrea brevis</i>      | Milne Edwards & Haime, 1849   | 4 | IUI | IUI-010 | SIRS162-15 | Veron (2000)                                                                   | Mussidea:1,2,1, <b>1</b> ,1,1,2,2                                              |
| <b>SIRS-162</b> | <i>Platygyra acuta</i>          | Veron, 2000                   | 4 | IUI | IUI-011 | SIRS163-15 | Veron (2000)                                                                   | Faviidae:3,1,2,2,1, <b>1</b> ,2,2,2,2,1                                        |
| <b>SIRS-163</b> | <i>Coscinaraea monile</i>       | (Forskål, 1775)               | 4 | IUI | IUI-012 | SIRS164-15 | Loya & Slobodkin (1971)                                                        | Siderastreidae:2, <b>2</b> ,2,1                                                |
| <b>SIRS-164</b> | <i>Cycloseris cyclolites</i>    | (Lamarck, 1815)               | 4 | IUI | IUI-013 | SIRS165-15 | Scheer & Pillai (1983)                                                         | Fungiidae:1,1,1,1, <b>1</b> ,1,1,1,1                                           |
| <b>SIRS-165</b> | <i>Leptastrea inaequalis</i>    | Klunzinger, 1879              | 4 | IUI | IUI-014 | SIRS166-15 | Scheer & Pillai (1983)                                                         | Faviidae:3,2,2, <b>2</b> ,1,2,1                                                |
| <b>SIRS-166</b> | <i>Pavona varians</i>           | (Verrill, 1864)               | 4 | IUI | IUI-015 | SIRS167-15 | Loya & Slobodkin (1971)                                                        | Agariciidae:1,1, <b>2</b> ,1,2,2                                               |
| <b>SIRS-167</b> | <i>Stylophora kuehlmanni</i>    | Scheer & Pillai, 1983         | 4 | IUI | IUI-016 | SIRS168-15 | Scheer & Pillai (1983)                                                         | Pocilloporidae:2,2,1,2,2,1                                                     |
| <b>SIRS-168</b> | <i>Coscinaraea monile</i>       | (Forskål, 1775)               | 4 | IUI | IUI-017 | SIRS169-15 | Loya & Slobodkin (1971)                                                        | Siderastreidae:2, <b>2</b> ,2,1                                                |
| <b>SIRS-169</b> | <i>Echinopora fruticulosa</i>   | (Ehrenberg, 1834)             | 4 | IUI | IUI-018 | SIRS170-15 | Loya & Slobodkin (1971) ( <i>Echinopora gemmacea</i> var. <i>fruticulosa</i> ) | Faviidae: <b>4</b> ,2,2,1,2                                                    |
| <b>SIRS-170</b> | <i>Acanthastrea brevis</i>      | Milne Edwards & Haime, 1849   | 4 | IUI | IUI-019 | SIRS171-15 | Veron (2000)                                                                   | Mussidea:1,2,1, <b>1</b> ,1,1,2,2                                              |
| <b>SIRS-171</b> | <i>Dipsastraea faviaformis</i>  | (Veron, 2000)                 | 4 | IUI | IUI-020 | SIRS172-15 | Veron (2000) ( <i>Acanthastrea faviaformis</i> )                               | Mussidea:1,2,1, <b>1</b> ,1,1,1,2,1                                            |
| <b>SIRS-172</b> | <i>Cyphastrea serailia</i>      | (Forskål, 1775)               | 4 | IUI | IUI-021 | SIRS173-15 | Loya & Slobodkin (1971)                                                        | Faviidae:3,2,1, <b>1</b> ,1,1,1,2                                              |
| <b>SIRS-173</b> | <i>Leptastrea transversa</i>    | Klunzinger, 1879              | 4 | IUI | IUI-022 | SIRS174-15 | Mergner & Schuhmacher (1981)                                                   | Faviidae:3,2,2, <b>2</b> ,2,2,1                                                |
| <b>SIRS-174</b> | <i>Paragoniastrea</i> sp.       | Milne Edwards & Haime, 1848   | 4 | IUI | IUI-023 | SIRS175-15 | Huang et al. (2014)                                                            | Faviidae:3,1,2,1,2, <b>1</b> (Too young to have adequate characteristics)      |

|                 |                                 |                                      |   |     |         |            |                                                            |                                                                                                                                                                  |
|-----------------|---------------------------------|--------------------------------------|---|-----|---------|------------|------------------------------------------------------------|------------------------------------------------------------------------------------------------------------------------------------------------------------------|
| <b>SIRS-175</b> | <i>Dipsastraea danai</i>        | (Milne Edwards & Haime, 1857)        | 4 | IUI | IUI-024 | SIRS176-15 | Scheer & Pillai (1983)<br>( <i>Favia danae</i> )           | Faviidae:3,1,1, <b>1</b> ,3,2,1,1,1                                                                                                                              |
| <b>SIRS-176</b> | <i>Dipsastraea faviaformis</i>  | (Veron, 2000)                        | 4 | IUI | IUI-025 | SIRS177-15 | Veron (2000)<br>( <i>Acanthastrea faviaformis</i> )        | Mussidea:1,2,1, <b>1</b> ,1,1,2,1                                                                                                                                |
| <b>SIRS-177</b> | <i>Coelastrea aspera</i>        | (Verrill, 1866)                      | 4 | IUI | IUI-026 | SIRS178-15 | Scheer & Pillai (1983)<br>( <i>Goniastrea aspera</i> )     | Faviidae:3,1,2,1,2, <b>1</b> ,1,2,2,1,2                                                                                                                          |
| <b>SIRS-178</b> | <i>Dipsastraea</i> sp.          | Blainville, 1830                     | 4 | IUI | IUI-027 | SIRS179-15 | N/A                                                        | (Too young to have adequate characteristics)                                                                                                                     |
| <b>SIRS-179</b> | <i>Danafungia scruposa</i>      | (Klunzinger, 1879)                   | 4 | IUI | IUI-028 | SIRS180-15 | Scheer & Pillai (1983)<br>( <i>Fungia scruposa</i> )       | Fungiidae:1,1,1,2, <b>1</b> ,1,1,1                                                                                                                               |
| <b>SIRS-180</b> | <i>Dipsastraea faviaformis</i>  | (Veron, 2000)                        | 4 | IUI | IUI-029 | SIRS181-15 | Veron (2000)<br>( <i>Acanthastrea faviaformis</i> )        | Mussidea:1,2,1, <b>1</b> ,1,1,2,1                                                                                                                                |
| <b>SIRS-181</b> | <i>Dipsastraea danai</i>        | (Milne Edwards & Haime, 1857)        | 4 | IUI | IUI-030 | SIRS182-15 | Scheer & Pillai (1983)<br>( <i>Favia danae</i> )           | Faviidae:3,1,1, <b>1</b> ,3,2,1,1,1                                                                                                                              |
| <b>SIRS-182</b> | <i>Astraeosmilia maxima</i>     | (Veron, Pichon & Wijsman-Best, 1977) | 4 | IUI | IUI-031 | SIRS183-15 | Veron (2000) ( <i>Favia maxima</i> )                       | Faviidae:3,1,1, <b>1</b> ,3,2,1,2,2,1                                                                                                                            |
| <b>SIRS-183</b> | <i>Platygyra lamellina</i>      | (Ehrenberg, 1834)                    | 4 | IUI | IUI-032 | SIRS184-15 | Loya & Slobodkin (1971)                                    | Faviidae:3,1,2,2,1, <b>1</b> ,2,1                                                                                                                                |
| <b>SIRS-184</b> | <i>Psammocora profundacella</i> | Gardiner, 1898                       | 4 | IUI | IUI-033 | SIRS185-15 | Scheer & Pillai (1983)                                     | Siderastreidae:2, <b>1</b> ,2,2,2,1,2,1<br>(Identified as <i>P. haimeana</i> according to Veron (2000), according to Benzoni et al. (2010) the name was revised) |
| <b>SIRS-185</b> | <i>Dipsastraea faviaformis</i>  | (Veron, 2000)                        | 4 | IUI | IUI-034 | SIRS186-15 | Veron (2000)<br>( <i>Acanthastrea faviaformis</i> )        | Mussidea:1,2,1, <b>1</b> ,1,1,2,1                                                                                                                                |
| <b>SIRS-186</b> | <i>Dipsastraea laxa</i>         | (Klunzinger, 1879)                   | 4 | IUI | IUI-035 | SIRS187-15 | Loya & Slobodkin (1971) ( <i>Plesiastrea laxa</i> )        | Faviidae:3,1,1, <b>1</b> ,1,2,2                                                                                                                                  |
| <b>SIRS-187</b> | <i>Cycloseris vaughani</i>      | (Boschma, 1923)                      | 4 | IUI | IUI-036 | SIRS188-15 | Scheer & Pillai (1983)                                     | Fungiidae:1,1,1,1, <b>1</b> ,1,2,2,1,1                                                                                                                           |
| <b>SIRS-188</b> | <i>Dipsastraea amicornum</i>    | (Milne Edwards & Haime, 1849)        | 4 | IUI | IUI-037 | SIRS189-15 | Mergner & Schuhmacher (1974)<br>( <i>Favia amicornum</i> ) | Faviidae:3,1,1, <b>2</b> ,2                                                                                                                                      |

|                 |                                        |                 |   |     |         |            |                                                         |                                                                          |
|-----------------|----------------------------------------|-----------------|---|-----|---------|------------|---------------------------------------------------------|--------------------------------------------------------------------------|
| <b>SIRS-189</b> | <i>Acropora</i> sp.4                   | Oken, 1815      | 4 | IUI | IUI-038 | SIRS190-15 | N/A                                                     | Acroporidae:2,2 (Too young to have adequate characteristics)             |
| <b>SIRS-190</b> | <i>Acropora</i> sp.4                   | Oken, 1815      | 4 | IUI | IUI-039 | SIRS191-15 | N/A                                                     | Acroporidae:2,2 (Too young to have adequate characteristics)             |
| <b>SIRS-191</b> | <i>Acropora</i> cf. <i>plantaginea</i> | (Lamarck, 1816) | 4 | IUI | IUI-040 | SIRS192-15 | Scheer & Pillai (1983) ( <i>Madrepora plantaginea</i> ) | Acroporidae:2,2,7,2,1,1,2,2 (Too young to have adequate characteristics) |

## References

- Arrigoni, R., Berumen, M. L., Huang, D., Terraneo, T. I., & Benzoni, F. (2017). *Cyphastrea* (Cnidaria:Scleractinia:Merulinidae) in the Red Sea: Phylogeny and a new reef coral species. *Invertebrate Systematics*, 31(2), 141–156. <https://doi.org/10.1071/IS16035>
- Arrigoni, R., Berumen, M. L., Terraneo, T. I., Caragnano, A., Bouwmeester, J., & Benzoni, F. (2015). Forgotten in the taxonomic literature: Resurrection of the scleractinian coral genus *Sclerophyllia* (Scleractinia, Lobophylliidae) from the Arabian Peninsula and its phylogenetic relationships. *Systematics and Biodiversity*, 13(2), 140–163. <https://doi.org/10.1080/14772000.2014.978915>
- Benzoni, F., Stefani, F., Pichon, M., & Galli, P. (2010). The name game: Morpho-molecular species boundaries in the genus *Psammocora* (Cnidaria, Scleractinia). *Zoological Journal of the Linnean Society*, 160(3), 421–456. <https://doi.org/10.1111/j.1096-3642.2010.00622.x>
- Huang, D., Benzoni, F., Fukami, H., Knowlton, N., Smith, N. D., & Budd, A. F. (2014). Taxonomic classification of the reef coral families Merulinidae, Montastraeidae, and Diploastraeidae (Cnidaria: Anthozoa: Scleractinia). *Zoological Journal of the Linnean Society*, 171(2), 277–355. <https://doi.org/10.1111/zoj.12140>
- Kleemann, K., & Baal, C. (2012). Note on the coral *Blastomussa loyae*, a valid species from the Red Sea. *Journal of the Marine Biological Association of the United Kingdom*, 92(4), 699–701. <https://doi.org/10.1017/S002531541100141X>
- Loya, Y., & Slobodkin, L. B. (1971). The coral reefs of Eilat (Gulf of Eilat, Red Sea). *Symp. Zool. Soc. Lond*, 28, 117–139.
- Mergner, H. (1984). The Ecology Research on Coral Reef of the Red Sea. *Deep Sea Research Part A. Oceanographic Research Papers*, 31(6–8), 855–884.
- Mergner, H., & Schuhmacher, H. (1974). Morphology, ecology and zonation of coral reefs at Aqaba (Gulf of Aqaba, Red Sea). *Helgoländer Wissenschaftliche Meeresuntersuchungen*, 26(3–4), 238–358. <https://doi.org/10.1007/BF01627619>
- Mergner, H., & Schuhmacher, H. (1981). Quantitative Analyse der Korallenbesiedlung eines Vorriffareals bei Aqaba (Rotes Meer). *Helgoländer Meeresuntersuchungen*, 34(3), 337–354. <https://doi.org/10.1007/BF02074127>
- Scheer, G., & Pillai, C. S. G. (1983). Report on the stony corals from the Red Sea. *Zoologica*, 45(3), 1–198.

Veron, J. E. N. (2000). *Corals of the world*. Australian Institute of Marine Sciences and CRR Qld Pty Ltd.
