# Supplementary material
Source: MDPI journal article supplement (https://www.mdpi.com/2077-1312/10/12/1917)

Phylogenetic tree of coral samples from Eilat, based on the maximum likelihood of the partial mitochondrial *COI* gene from the 191 coral samples collected in this study. Values at the nodes represent bootstrap values. (A) Full tree view. (B) Detailed view of Robust clade. (C) Detailed view of Complex clade. Number preceding scientific name is the sample number in the study detailed in Supplementary Table 1. The tree is rooted by the anemone *Entacmaea quadricolor* (Actiniidae).

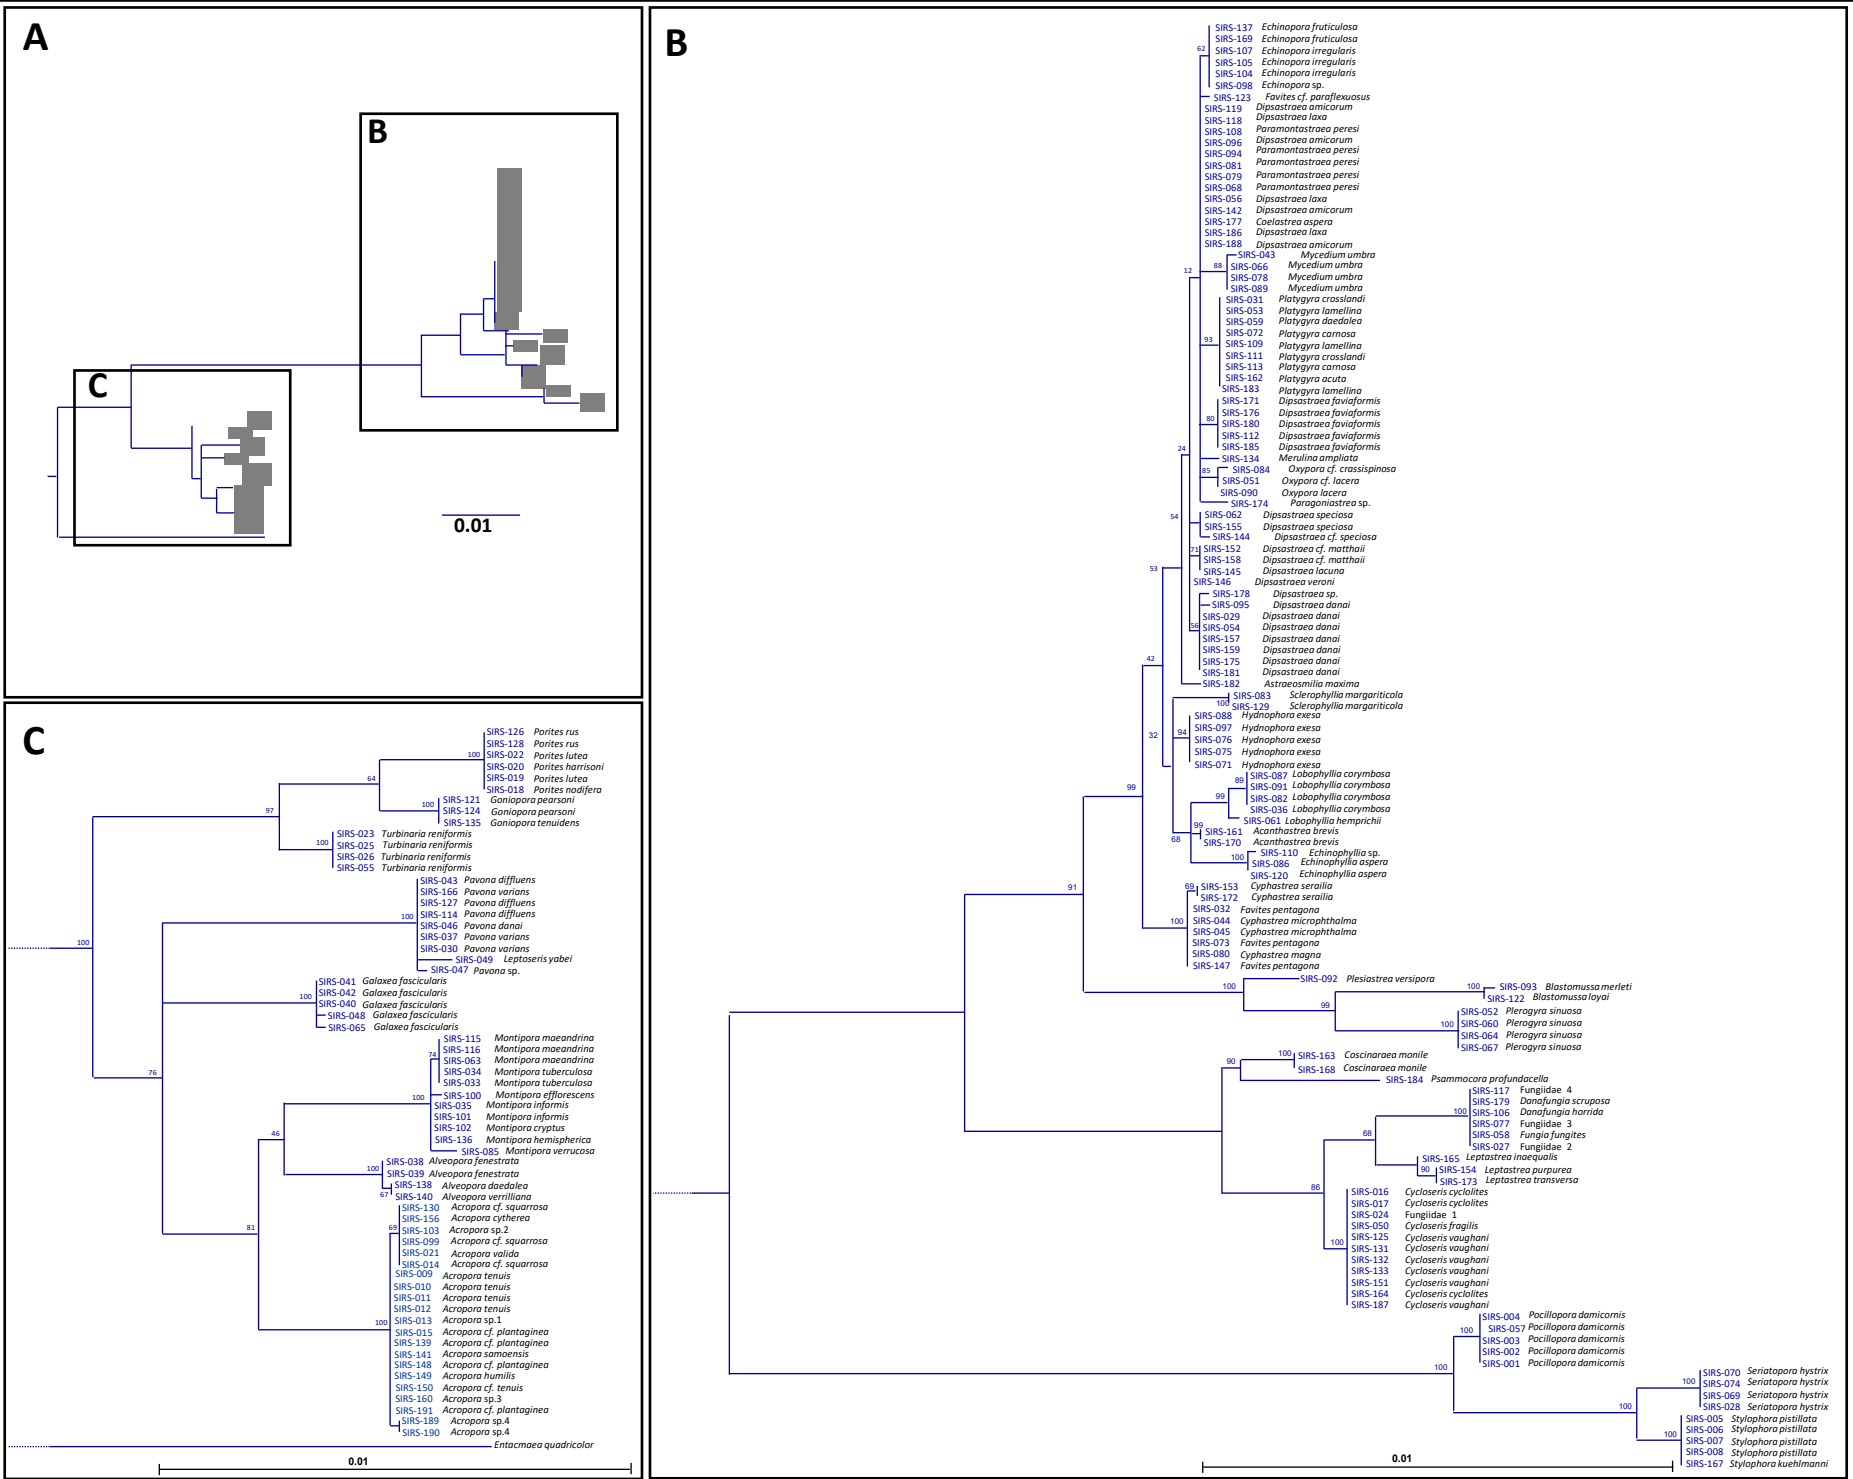

Supplement: s1 [file s1]
